# Supplementary material
Source: publisher figshare collection journal article supplement (https://karger.figshare.com/ndownloader/files/26633372)
Supplement: Supplementary file 1 [file 26633372]

**Supplemental Table: Study Medication Dosing:**

| **Enrollment Weight*** | **Study Medication Dosing** |
| --- | --- |
| **More than or equal to 80 Kg** | 2 tablets daily |
| **70 – 80 Kg** | 2 tablets daily for six days a week |
| **60 – 70 Kg** | 2 tablets daily for five days a week |
| **50 – 60 Kg** | 2 tablets daily for four days a week |

Each tablet consists of either 200mg of active hydroxychloroquine or a matching placebo. All randomized subjects receive one tablet daily for the initial 2 week period followed by the recommended schedule above for the remainder of the 18 months. *Study medication dosing was standardized to fall below 5 mg/kg/day dose averaged over a 7-day period.
